# Supplementary material for: Integrative Profiling of Alternative Splicing Induced by U2AF1 S34F Mutation in Lung Adenocarcinoma Reveals a Mechanistic Link to Mitotic Stress
Source: PubMed Central journal article supplement — Mol Cells. 2018 Jul 10;41(8):733–41. doi: 10.14348/molcells.2018.0176 (PMC6125417; doi:10.14348/molcells.2018.0176), 2018-07-10

**Fig. S1.** Structure of *U2AF1* gene and AS-derived variant proteins.

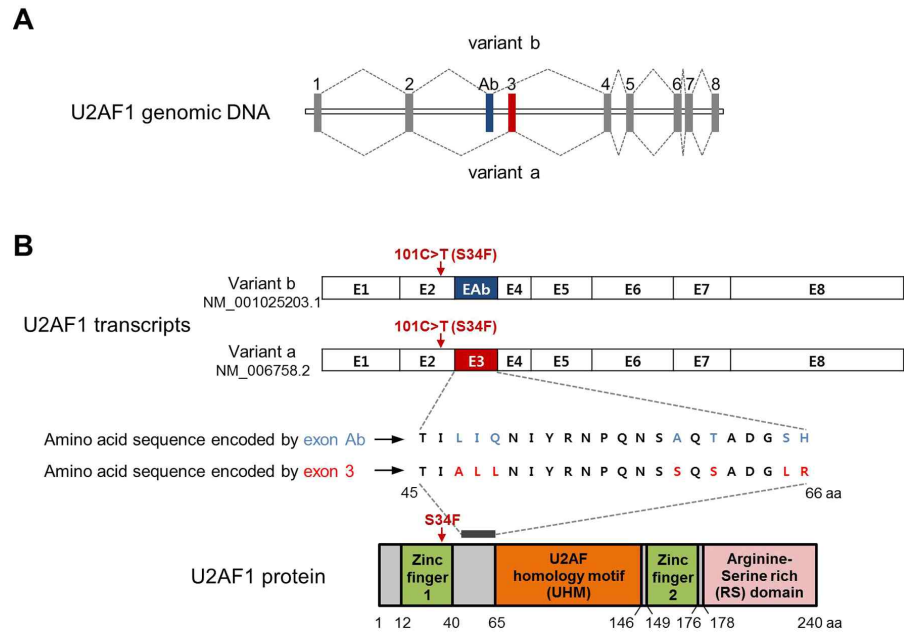

**Fig. S2. RT-PCR validation of AS events.**

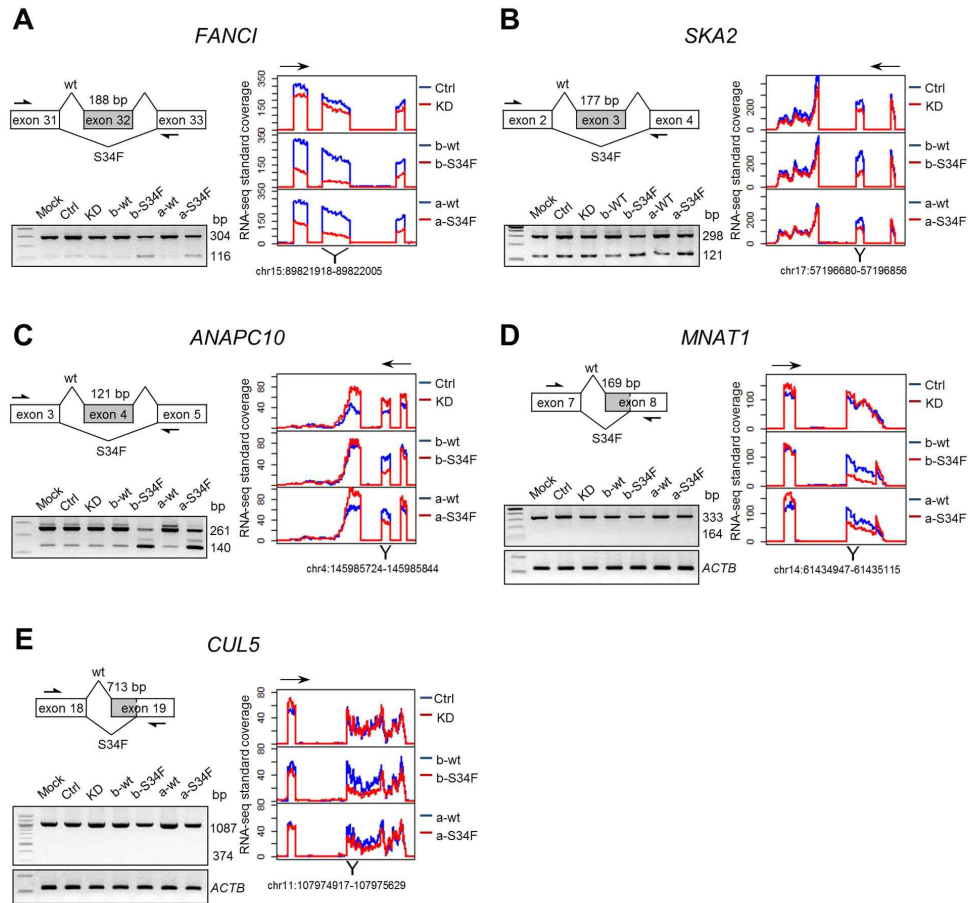

**Fig. S3.** Comparison of effects of KD by siRNA#1 and siRNA#2.

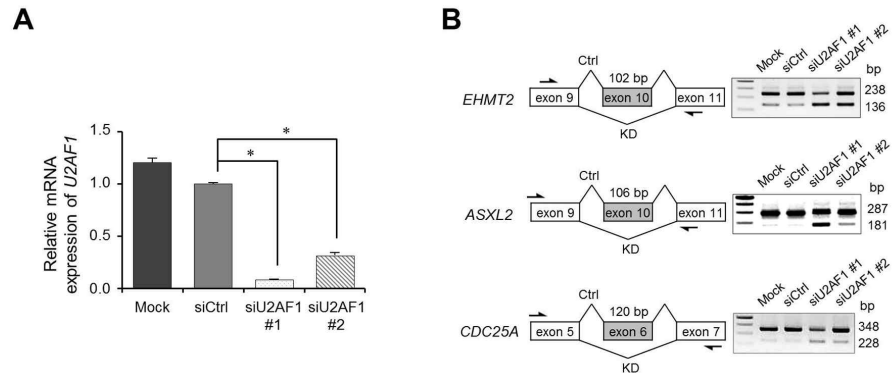

Supplement: molce-41-8-733-suppl4.pdf [file molce-41-8-733-suppl4.pdf]
