# Supplementary material for: Integrative Profiling of Alternative Splicing Induced by U2AF1 S34F Mutation in Lung Adenocarcinoma Reveals a Mechanistic Link to Mitotic Stress
Source: PubMed Central journal article supplement — Mol Cells. 2018 Jul 10;41(8):733–41. doi: 10.14348/molcells.2018.0176 (PMC6125417; doi:10.14348/molcells.2018.0176), 2018-07-10
Supplement: molce-41-8-733-suppl5.pdf [file molce-41-8-733-suppl5.pdf]

**Table S1.** Oligonucleotide primers used for RT-PCR.

| <b>Gene</b>    | <b>NCBI no.</b> | <b>Forward primer (5'-3')</b> | <b>Reverse primer (5'-3')</b> |
|----------------|-----------------|-------------------------------|-------------------------------|
| <i>PARD3</i>   | NM_019619.3     | CATGTTTCGACGCAGTAGTGAC        | CAGGTTCAACACGACTGTTATC        |
| <i>ERBB2IP</i> | NM_018695.3     | CCTCGTGACTGGAGAGAACAAG        | CATCAGGTCTGAATGGGTTTC         |
| <i>MARK3</i>   | NM_001128918.2  | GGTGGGAATGGGATATTCAC          | GCACTTTGTGGTGAGGAGACT         |
| <i>CDC25A</i>  | NM_001789.2     | CAGAAGCTGTTGGGATGTAGTC        | CTCTCCATCGAGAAGGTCCAC         |
| <i>FANCI</i>   | NM_001113378.1  | GTTCTGAGTCAGGCCGAGAAG         | CTCCGGAGCTCTGACACAC           |
| <i>SKA2</i>    | NM_182620.3     | CAGAAAGCTGAGTCTGATCTGG        | CTGCCGCAGTTTTCTCTTCT          |
| <i>ANAPC10</i> | NM_001256706.1  | GCAAACCAGGATTTGGAGTG          | GAACATGAATCCAGCCACTTG         |
| <i>MNAT1</i>   | NM_002431.3     | CACTGGCACCTATTCACAAGC         | GGAAGGACTGTGTTGTGCAG          |
| <i>CUL5</i>    | NM_003478.3     | GGACGTTTGCAGCTCACTAC          | GCTATTTTGGCTCTGCAATCA         |
| <i>EHMT2</i>   | NM_006709.4     | CAAGAAGAAATGGCGAAAAGAC        | CTCAAACCCTCGCTCTGTCT          |
| <i>ASXL2</i>   | NM_018263.4     | GGTTGGTCCAGATGGTTTAATG        | GTTGTTTCAGCTGGGGTTTTTC        |
| <i>ACTB</i>    | NM_001101.3     | ACAGAGCCTCGCCTTTGC            | GAAGCCGGCCTTGACAT             |
